# Supplementary material for: Nanodrug regulates ROS homeostasisviaenhancing fatty acid oxidation and inhibiting autophagy to overcome tumor drug resistance
Source: Royal Society of Chemistry journal article supplement (doi:10.1039/d3bm01139a), 2023-01-01
Supplement: d3bm01139a1.pdf [file d3bm01139a1.pdf]

## Supplementary Materials for

### Nanodrug Regulates ROS homeostasis via enhancing fatty acid oxidation and inhibiting autophagy to overcome tumor drug resistance

HaiYang Wang<sup>a,†</sup>, Minzhao Lin<sup>a,†</sup>, Gengjia Chen<sup>a</sup>, Zecong Xiao<sup>b,\*</sup> and Xintao Shuai<sup>a,b,\*</sup>

\*Corresponding authors. E-mail: shuaixt@mail.sysu.edu.cn (X. T. Shuai);

xiao92826@hotmail.com (Z.C. Xiao)

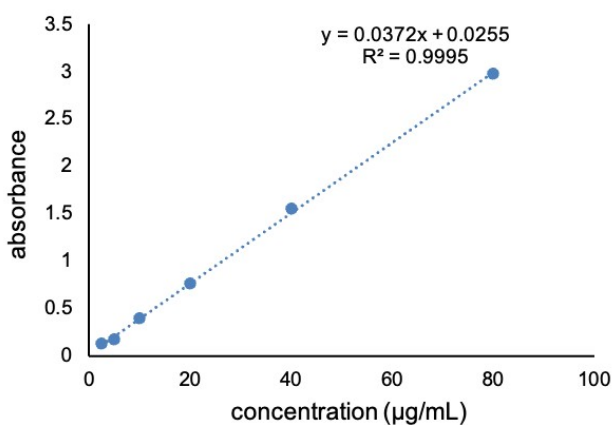

Figure S1. CQ UV Standard Curve

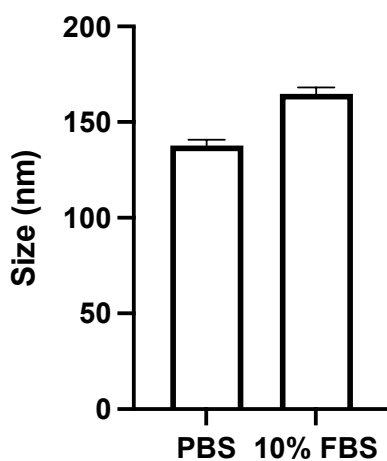

Figure S2. The size of nanodrug in PBS or PBS with 10% FBS (mean  $\pm$  SD; n = 3)

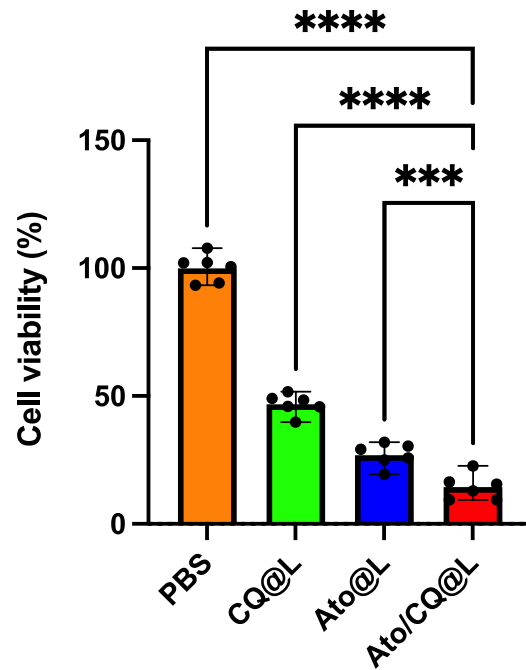

**Figure S3.** The cell viability of 4T1 cells receiving different treatments (mean  $\pm$  SD; n = 3, \*\*\*p < 0.001).

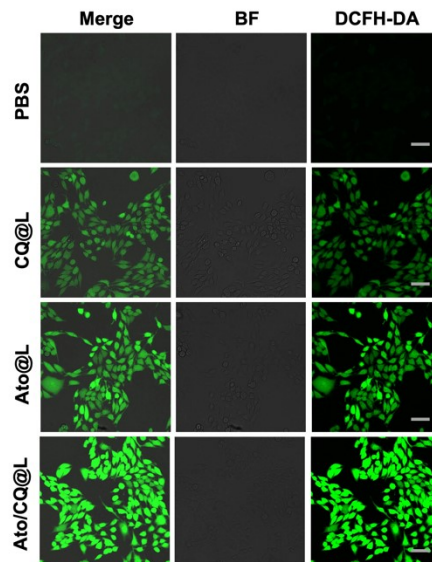

**Figure S4.** The intracellular ROS levels in 4T1 cells after treatment with nanodrugs were detected with DCFH-DA (scale bar = 10  $\mu$ m).

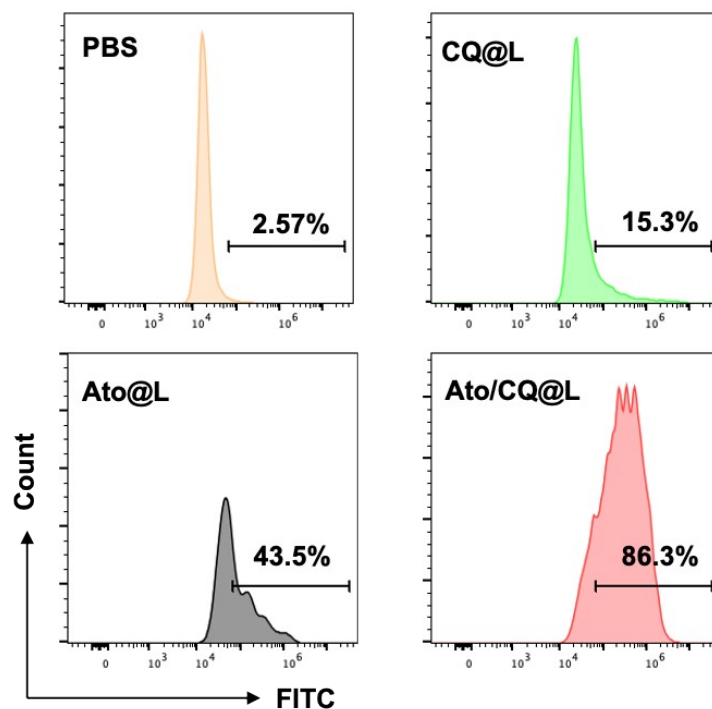

**Figure S5.** Quantitative analysis of the intracellular ROS levels in 4T1 cells after treatment with nanodrugs by flow cytometry.

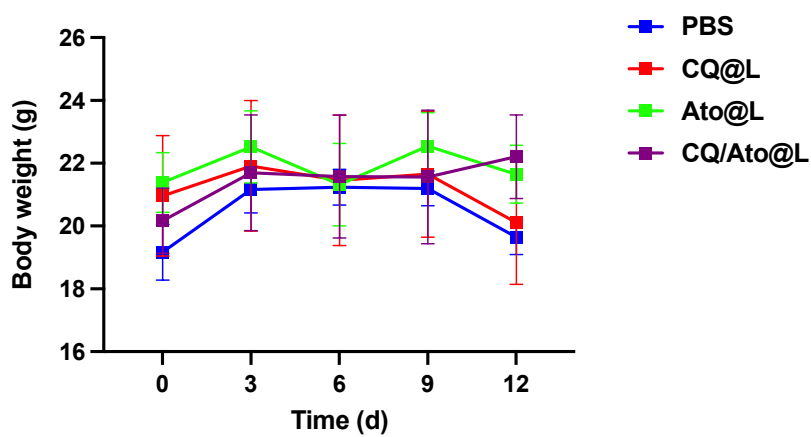

**Figure S6.** Changes of body weight during various treatments (mean  $\pm$  SD; n = 3).
